# Supplementary material for: pH-Sensitive Fluorescence Emission of Boron/Nitrogen Co-Doped Carbon Quantum Dots
Source: MDPI journal article supplement (doi:10.3390/coatings13020456), 2023-02-17
Supplement: s1 [file s1]

# Supplementary Materials: pH-Sensitive Fluorescence Emission of Boron/Nitrogen Co-Doped Carbon Quantum Dots

Oguzhan Ustun <sup>1</sup>, Sugra Naz Karadag <sup>2</sup>, Hayrunnisa Mazlumoglu <sup>3</sup>, Asli Yilmaz <sup>2,\*</sup> and Mehmet Yilmaz <sup>1,3,\*</sup>

<sup>1</sup> Department of Nanoscience and Nanoengineering, Ataturk University, Erzurum 25240, Turkey; oguzhan.ustun@outlook.com

<sup>2</sup> Department of Molecular Biology and Genetics, Ataturk University, Erzurum 25240, Turkey; sugranazkaradag@gmail.com

<sup>3</sup> Department of Chemical Engineering, Ataturk University, Erzurum 25240, Turkey; h.mazlumoglu@atauni.edu.tr

\* Correspondence: asliozdilek@gmail.com (A.Y.); nano.yilmaz@gmail.com (M.Y.)

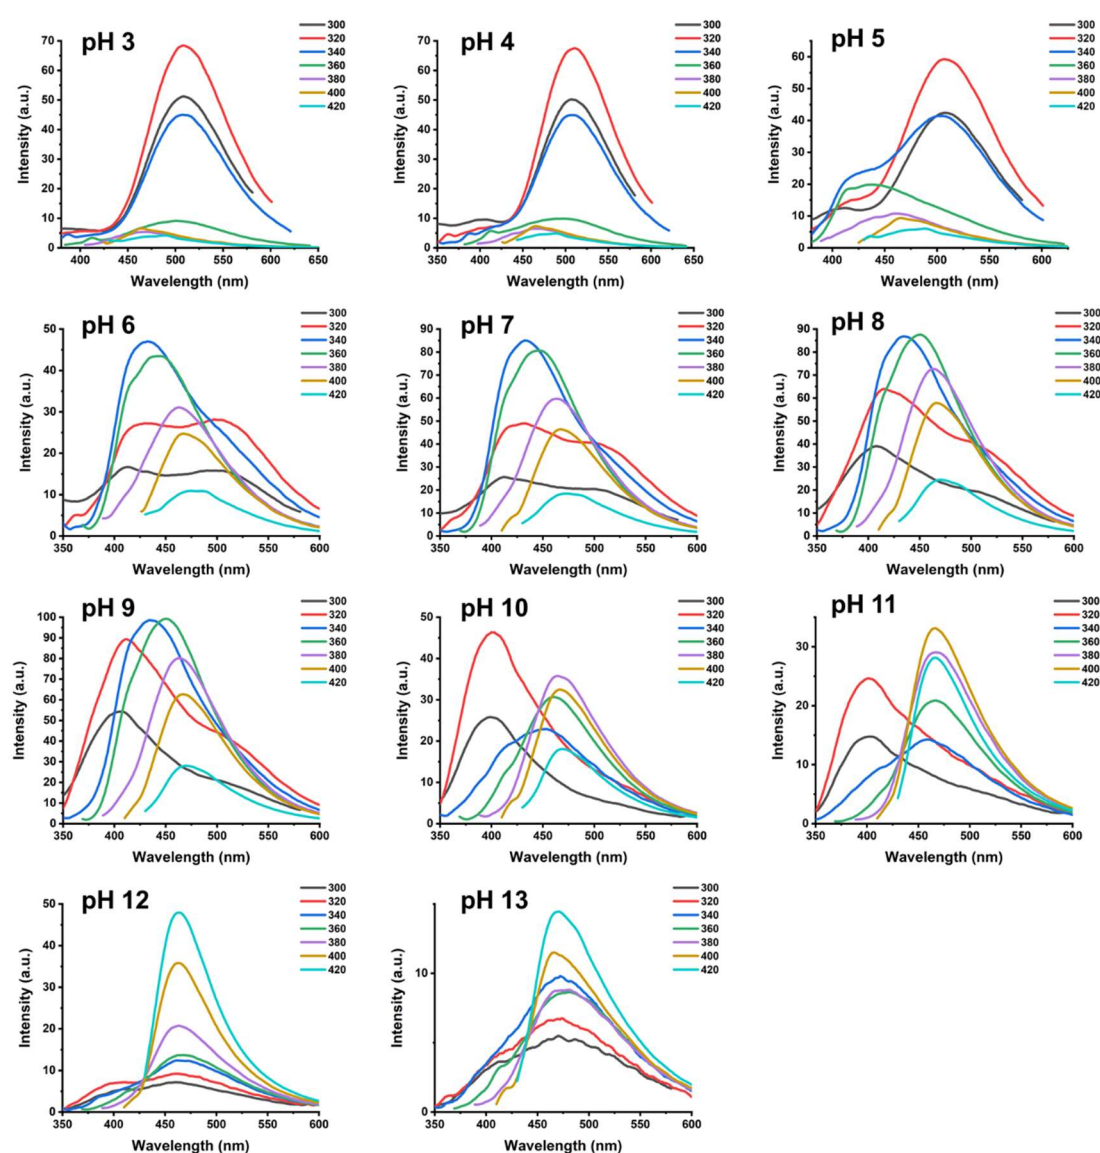

**Figure S1.** The PL spectra of B/N-CQDs at different pH conditions and excitation wavelengths.

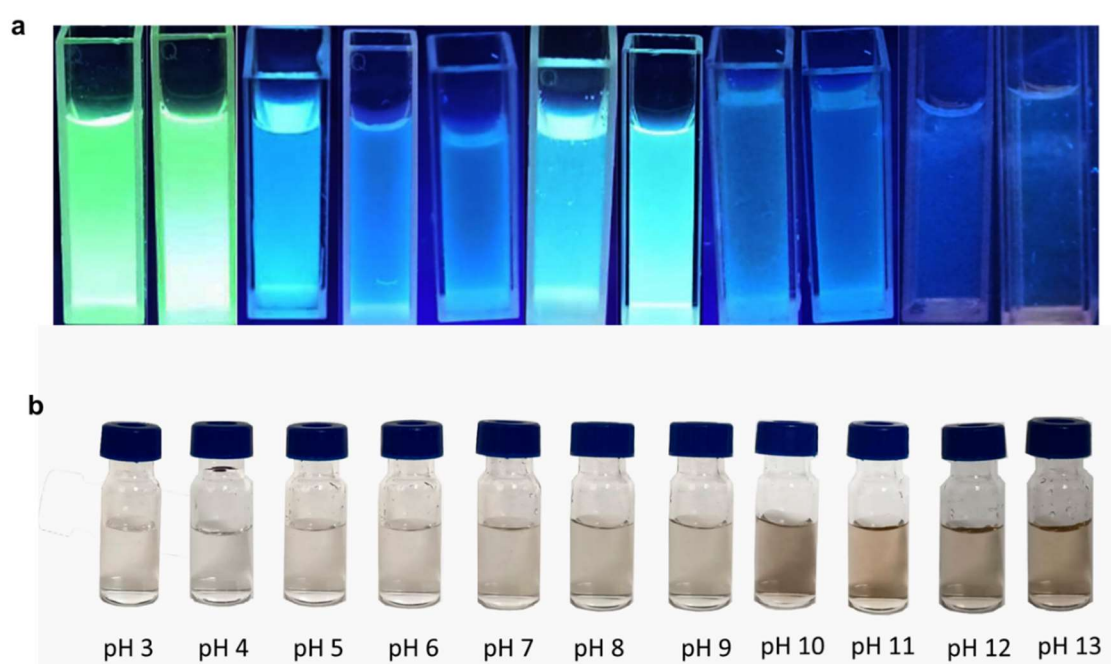

**Figure S2.** Optic images of CQDs at different pH conditions under a 365-nm UV lamb (a) and day-light (b).

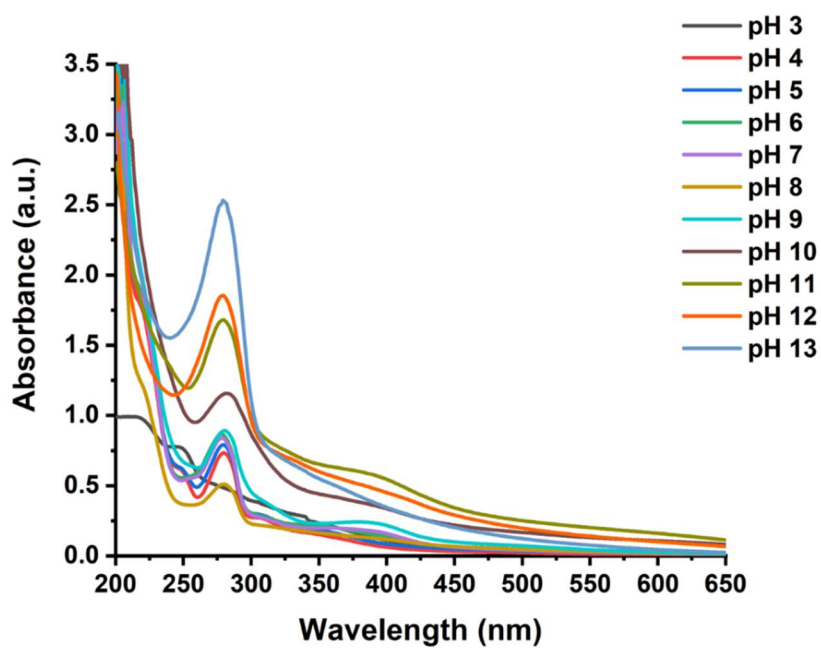

**Figure S3.** UV-vis absorption spectra of B/N-CQDs at different pH.

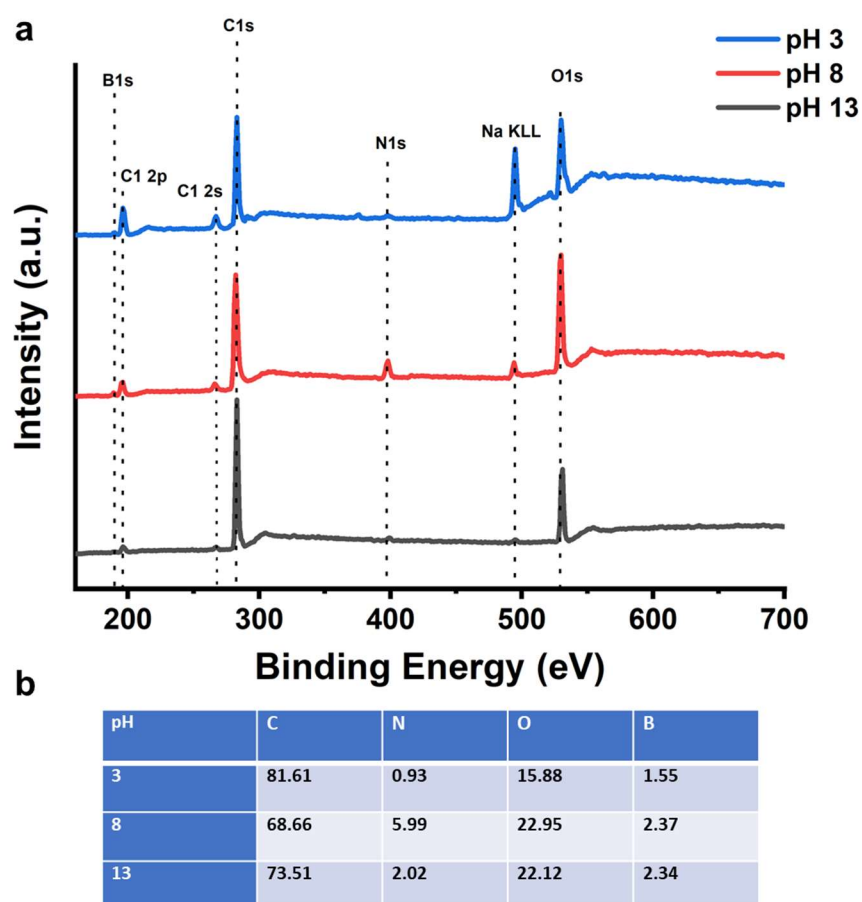

**Figure S4.** XPS survey spectrum (a) and elemental percentage of B/N-CQDs (b) under different pH conditions.

**Table S1.** Deconvolution of C1s under different pH conditions.

| pH | C-C/C=C | C-N  | C-O  | C=O  |
|----|---------|------|------|------|
| 3  | 70.9    | 24.0 | 2.6  | 2.3  |
| 8  | 74.1    | 6.5  | 17.6 | 1.70 |
| 13 | 42.3    | 29.7 | 24.6 | 3.2  |

**Table S2.** Deconvolution of O1s under different pH conditions.

| pH | C=O  | C-O  |
|----|------|------|
| 3  | 15.4 | 84.5 |
| 8  | 30.9 | 69.0 |
| 13 | 54.8 | 25.4 |

**Table S3.** Deconvolution N1s under different pH conditions.

| pH | N-H (Pyrrolic) | C-N=C (Pyridine) | N-(C) <sub>3</sub> (Graphitic) |
|----|----------------|------------------|--------------------------------|
| 3  | 73.8           | 13.8             | 12.2                           |
| 8  | 49.6           | 44.02            | 6.3                            |
| 13 | 27.3           | 28.4             | 44.2                           |
